# Supplementary material for: Estrogen-Dependent Uterine Secretion of Osteopontin Activates Blastocyst Adhesion Competence
Source: PLoS One. 2012 Nov 9;7(11):e48933. doi: 10.1371/journal.pone.0048933 (PMC3494704; doi:10.1371/journal.pone.0048933)
Supplement: Table S1 — Primer sequences and positive control tissues used for RT-PCR and qRT-PCR. (XLS) [file pone.0048933.s001.xls]

## Sheet: Sheet1
Table S1. Primer sequences and positive control tissues used for RT-PCR and qRT-PCR
Symbol	Accession no.	Forward primer	Reverse primer	Positive control tissue
Itga1	NM_001033228.3	GGCAAATGGGTTCTTATTGG	CCAGTCGTATAATGCAAATGTC	Fetus
Itga2	NM_008396.2	CCGGGTGCTACAAAAGTCAT	GTCGGCCACATTGAAAAAGT	Testis
Itga3	NM_013565.2	AGGCGGAACATCACCCTGGCT	TGGCTGCGGGCAAATCGGAG	Lung
Itga4	NM_010576.3	CCCAGGCTACATCGTTTTGT	CAAGGTGGTATGTGGCCTCT	Spleen
Itga5	NM_010577.3	TCAGATCCTCAGCAAGAACC	CCCAAGTCTTCCTCCTTCTG	Fetus
Itga6	NM_008397.3	CAATCGCTGGGAATATGGAC	GCTTTAACCTTGAGGCATATCC	Fetus
Itga7	NM_008398.2	GCTATTTAGGTTTCTCCATCG	GTACACATACACAGCACCTC	Heart
Itga8	NM_001001309.2	TTCGCGCGTCTCTGTTGCGT	AAGACACTGGCTGTGCGCGC	Lung
Itga9	NM_133721.2	TGCTGCCGACCTGCAGCTTC	TGCCCATCTCCTCCTTCTGCCA	Fetus
Itgav	NM_008402.2	CAGTTATTTGGGTTACTCTGTG	AACACATCTGCGTAATCATCC	Fetus
Itga2b	NM_010575.2	GACGGCTATAATGATATTGCTGTG	GATTCAGGGAGTCTTGAACCA	Bone
Itgb1	NM_010578.2	TGCTTAGTCTTACTGACAGAGG	CAATCAGCGATCCACAAACC	Fetus
Itgb3	NM_016780.2	TGACATCGAGCAGGTGAAAG	GAGTAGCAAGGCCAATGAGC	Fetus
Itgb5	NM_001145884.1	CTCCGGGAGCCAGAATGTGGAAGT	TTTCATAACGGGCCCTGGAGCG	Fetus
Itgb6	NM_001159564.1	TGCCTCATTATGCCGGTGGAAGAA	CGTGAGAAACCTCGCACGGGA	Kidney
Itgb7	NM_013566.2	TGCCTCCCAGAAGCCCACGT	GCCAGGGGCACAGCTGCATA	Spleen
Esr1	NM_007956.4	GCCAACCTTTGGCCAAGCCCT	AGTCCCCAAAGCCTGGCACTCT	Uterus
Esr2	NM_207707.1	TGACATGCTCCTGGCGACGAC	TCTGCTTCCTGGCTTGCGGT	Ovary
Vcl	NM_009502.4	AGGAGTCTGAGCAGGCCACA	CCCAGCGVAGAGTAAAGCCA	Fetus
Tln1	NM_011602.5	TGAGGCAGCCAATGCCTCTG	ATTTCCTGCCGCCTGTAGCC	Fetus
Ptk2	NM_001162366.1	GGCTGCAATCCCACACACCT	GCTCAGGAGCACCAGCGATT	Fetus
Fn1	NM_010233.1	GGCTGGAGCCTGGCATTGAC	AGGAGGGACAGCCGTTTGCT	Fetus
Spp1	NM_001204201.1	TTGCAGTCTTCTGCGGCAGG	CACTTTCACCGGGAGGGAGGA	Fetus
Vtn	NM_011707.2	TGCAAGCCCCAAGTAACGCG	TGCCGTCCGTCCGAGGATTT	Lung
Actb	NM_007393.3	GGCTCCGGCATGTGCAAAGCC	CCCACCATCACACCCTGGTGCCTA	Fetus
Hprt	NM_013556.2	GACCGGTTCTGTCATGCTG	ACCTGGTTCATCATCACTAATCAC	Fetus
